# Supplementary material
Source: publisher figshare collection journal article supplement (https://acs.figshare.com/ndownloader/files/4504738)
Supplement: Supplementary file 1 [file 4504738]

## Supporting Information

for

### **Microtubule-Stabilizing Activity of Zampanolide, A Potent Macrolide Isolated from the Tongan Marine Sponge *Cacospongia mycofijiensis***

Jessica J. Field,<sup>1,2</sup> A. Jonathan Singh,<sup>1,3</sup> Arun Kanakkanthara,<sup>1,2</sup> Tu'ikolongahau Halafihi,<sup>4</sup>  
Peter T. Northcote,<sup>1,3</sup> and John H. Miller\*<sup>1,2,5</sup>

*Centre for Biodiscovery and Schools of Biological Sciences and Chemical and Physical  
Sciences, Victoria University of Wellington, PO Box 600, Wellington, New Zealand, and  
Department of Fisheries, Ministry of Agriculture and Food, Forests and Fisheries,  
Kingdom of Tonga.*

<sup>1</sup> Centre for Biodiscovery, Victoria University of Wellington

<sup>2</sup> School of Biological Sciences, Victoria University of Wellington

<sup>3</sup> School of Chemical and Physical Sciences, Victoria University of Wellington

<sup>4</sup> Department of Fisheries, Ministry of Agriculture and Food, Forests and Fisheries, Kingdom  
of Tonga

\* To whom correspondence should be addressed. Telephone: +64 4 463 6082. Fax: +64 4  
463 5331. Email: john.h.miller@vuw.ac.nz.

## Table of Contents

|                                                                                                             |    |
|-------------------------------------------------------------------------------------------------------------|----|
| <b>Figure S1.</b> $^1\text{H}$ NMR (600 MHz) spectrum of zampanolide ( <b>1</b> ) in $\text{DMSO-}d_6$ .    | S3 |
| <b>Figure S2.</b> $^{13}\text{C}$ NMR (150 MHz) Spectrum of zampanolide ( <b>1</b> ) in $\text{DMSO-}d_6$ . | S4 |
| <b>Figure S3.</b> Trypan blue dye exclusion assay for HL-60 cells.                                          | S5 |
| <b>Figure S4.</b> $\text{G}_2/\text{M}$ block series for HL-60 cells.                                       | S6 |

Zampanolide, DMSO- $d_6$ , 600 MHz CP

File: home/jonathan/AJS11\_54Bhdms0600cp.fid

Pulse Sequence: s2pul

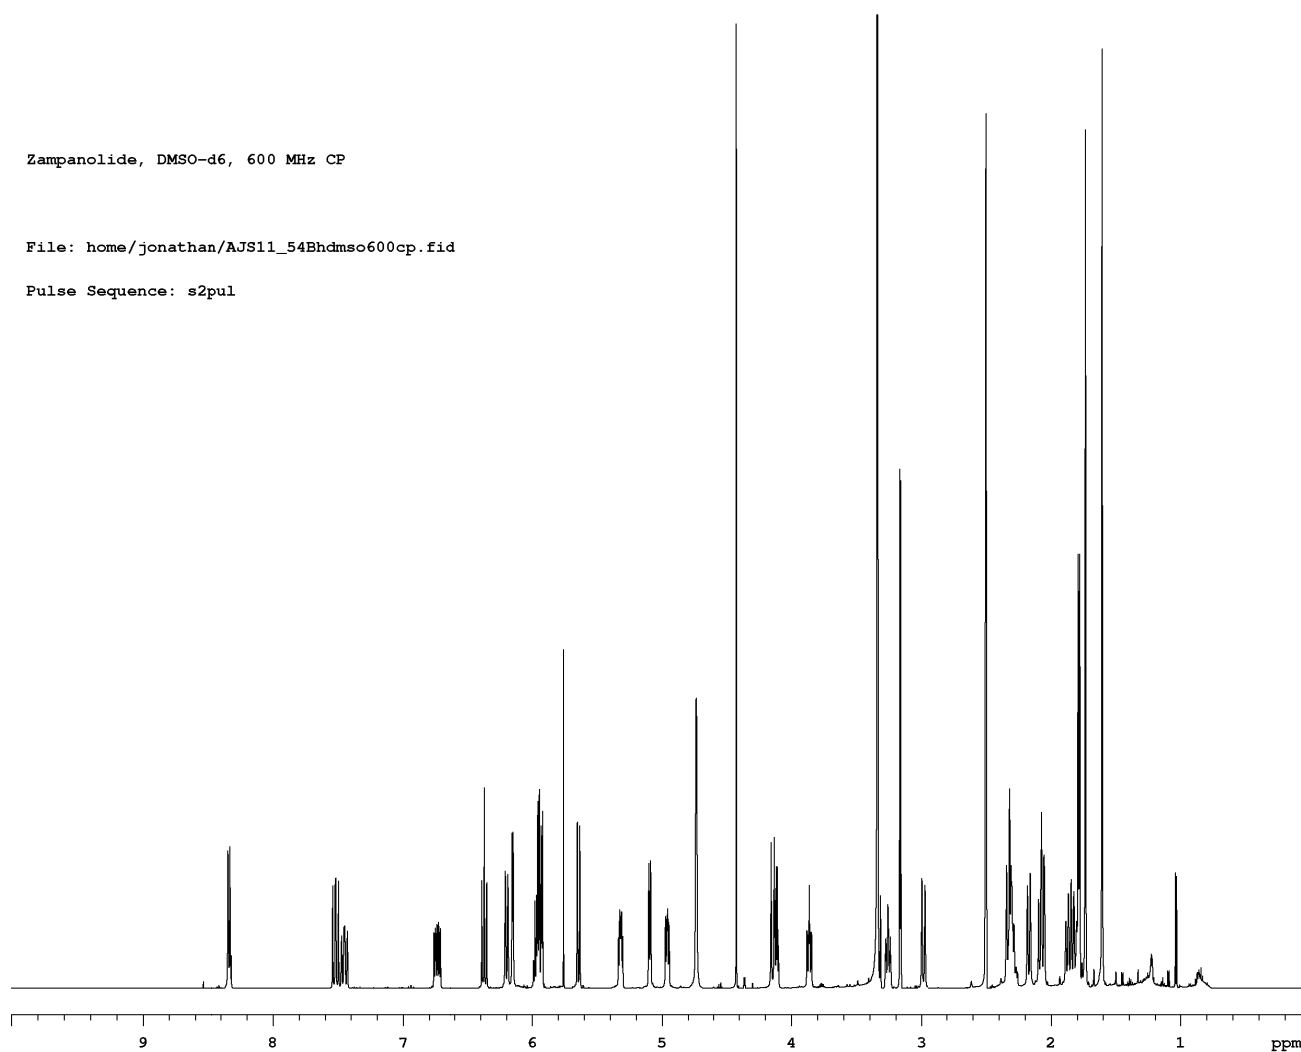

Note: resonance at  $\delta_H$  4.42 is nitromethane ( $\text{CH}_3\text{NO}_2$ ) added as an internal standard.

**Figure S1.**  $^1\text{H}$  NMR (600 MHz) spectrum of zampanolide (**1**) in  $\text{DMSO-}d_6$ .

**Figure S2.**  $^{13}\text{C}$  NMR (150 MHz) Spectrum of zampanolide (**1**) in  $\text{DMSO-}d_6$ .

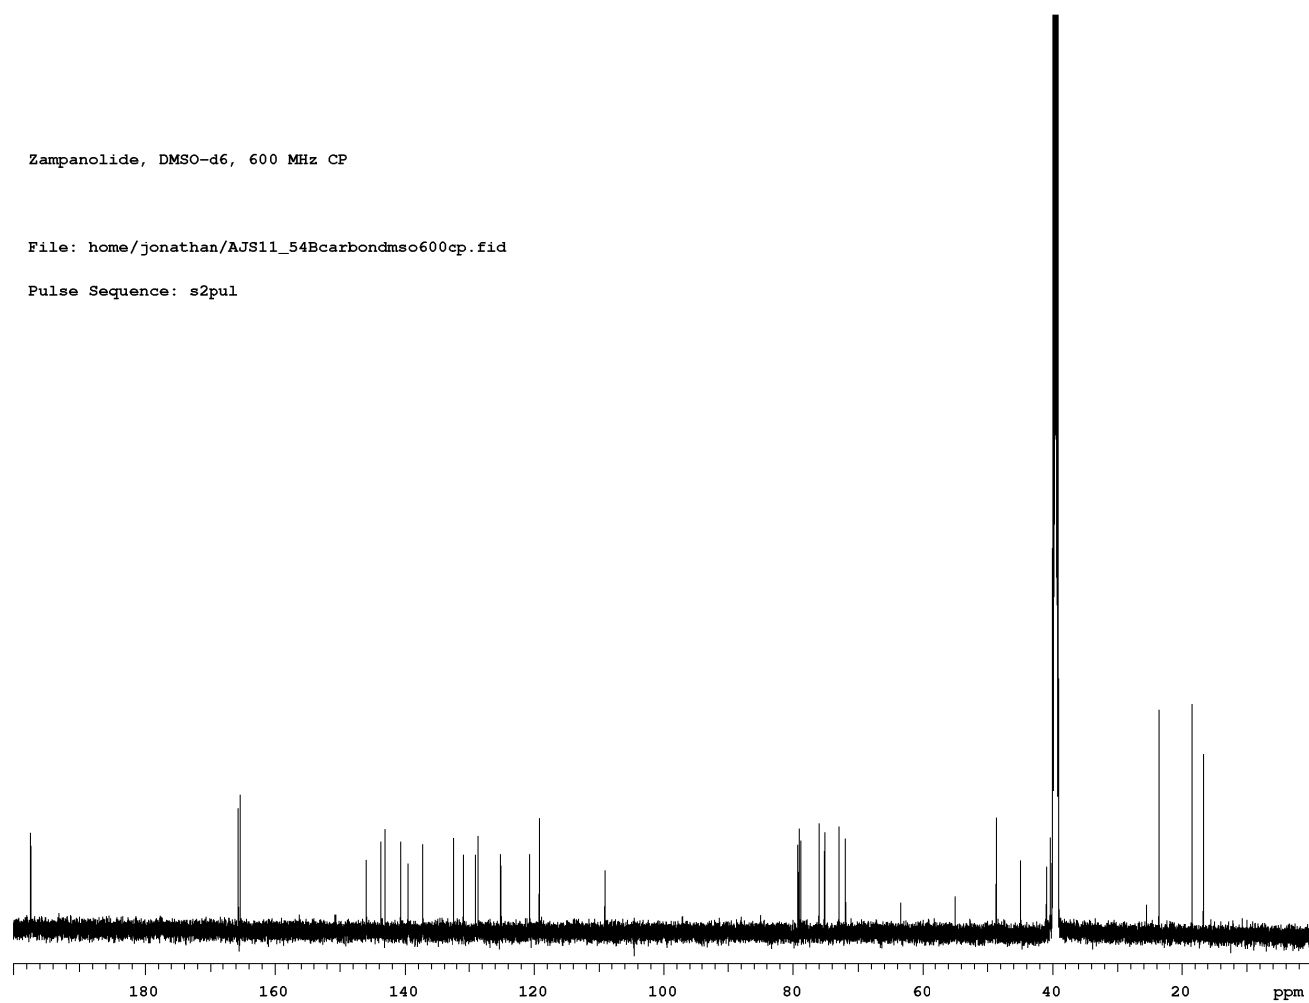

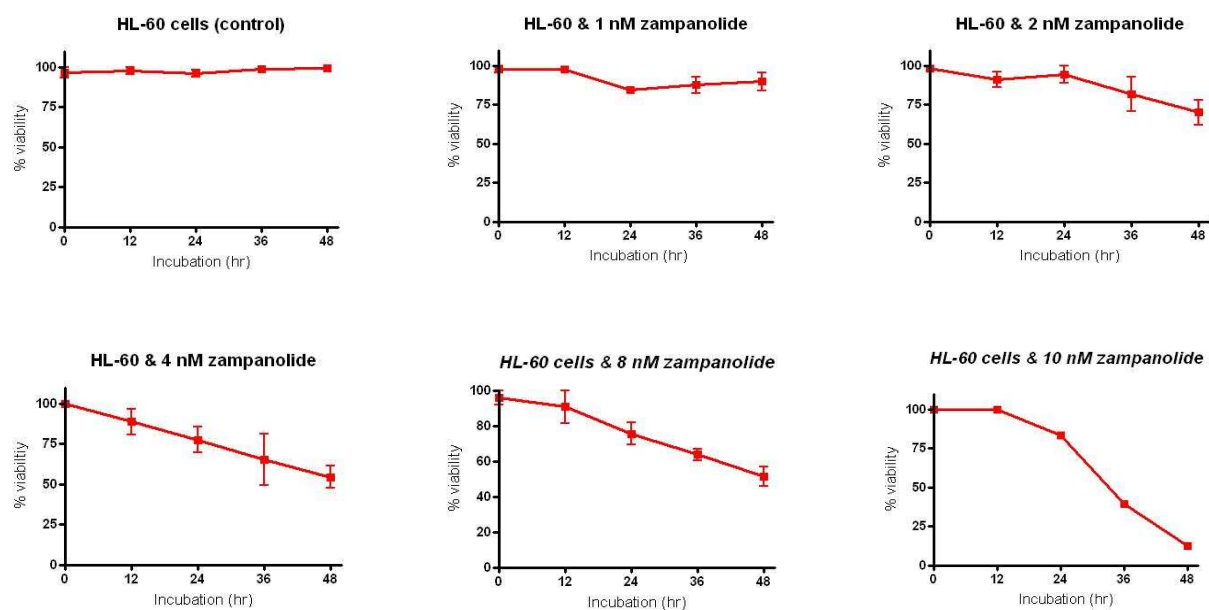

**Trypan blue dye exclusion assay for zampanolide.** Zampanolide effects on % viability of HL-60 cells. Cells were treated and aliquots taken every 12 hours from time 0 and assessed for cell viability using trypan blue dye exclusion. The results are presented as the mean  $\pm$  SEM ( $n = 2$  wells from two separate experiments).

**Figure S3.** Trypan blue dye exclusion assay for HL-60 cells.

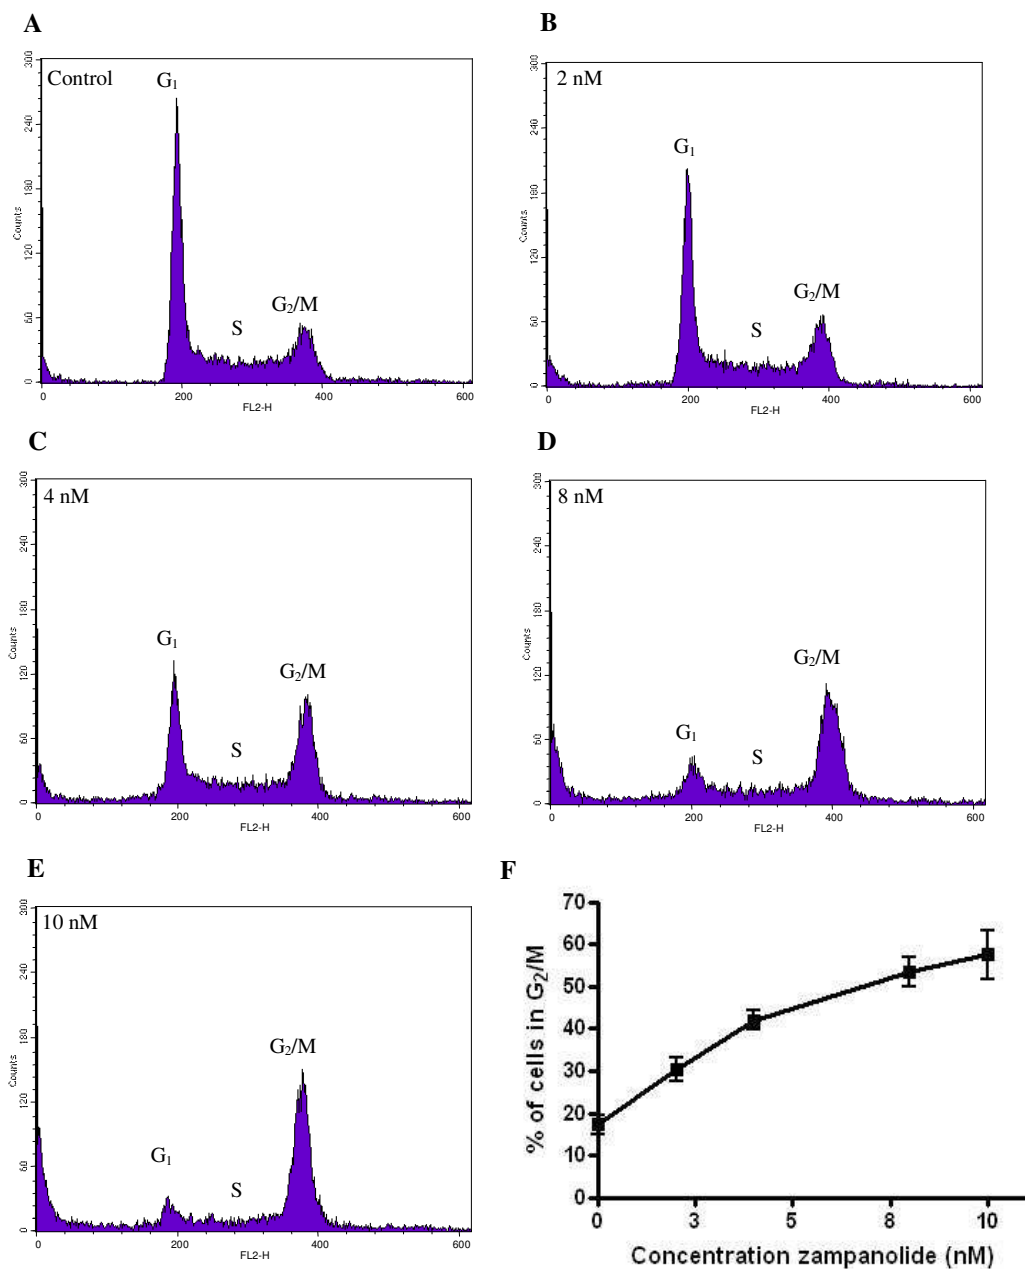

**Flow cytometry results (representative results).** A–E. At 10 nM zampanolide, 58% of HL-60 cells are in the G<sub>2</sub>/M phase of the cell cycle compared to 17% in untreated cells. The number of cells in G<sub>2</sub>/M increases in a dose-dependent manner. F. Summary graph, values are represented as the means  $\pm$  SEM ( $n = 4$ ).

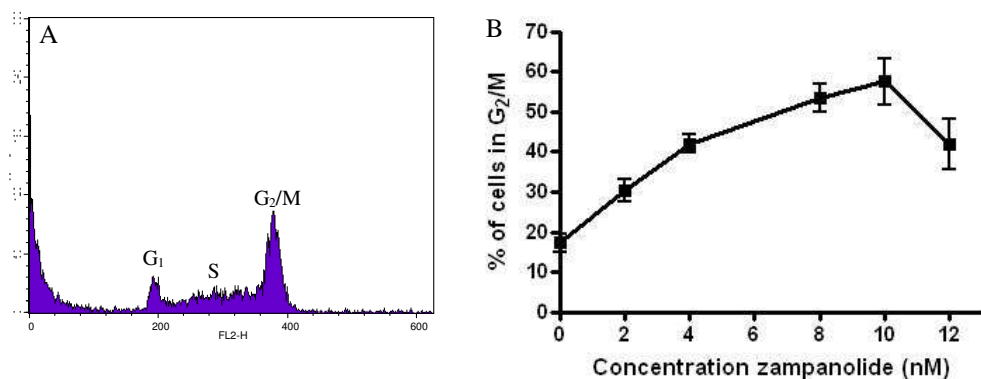

**Flow cytometry results for 12 nM zampanolide.** At 12 nM zampanolide there is a decrease in the number of cells arrested in G<sub>2</sub>/M and an increase in dead cells or cellular debris.

**Figure S4.** G<sub>2</sub>/M block series for HL-60 cells.
